# Supplementary material for: Wnt/β-Catenin Signaling Activation Induces Differentiation in Human Limbal Epithelial Stem Cells Cultured Ex Vivo
Source: MDPI journal article supplement (doi:10.3390/biomedicines11071829), 2023-06-26
Supplement: s1 [file s1]

## Supplementary information

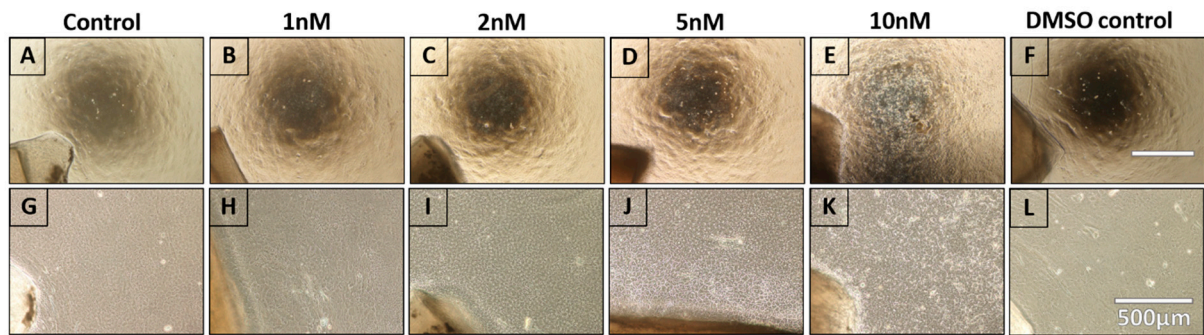

**Figure S1.** Morphology changes of primary hLESC cultures upon dose-dependent LY2090314 treatment. Light microscopy of the primary hLESCs growing out of limbal biopsies (left lower corner). hLESCs were cultured for nine days in COM initially, then increasing concentrations of LY2090314 were added to individual wells for six days. Control hLESCs (A, G) showed no morphological difference in comparison to DMSO control (F, L). hLESC culture appearance was altered upon 1 nM, 2 nM, and particularly 5 nM concentrations in regards to cell size, membrane thickening, and nucleus-to-cytoplasm (N:C) ratio. Cell culture treated with 10 nM LY2090314 concentration (E, K) seemed to be harmful after six days of treatment, as many damaged cells appeared in the superficial layers of the culture, and dead cells were found in the supernatants. Scale bars are the same for all images in the same row

**Table S1.** Assays used to identify changes in gene expression by real time qRT-PCR.

| Gene name                                  | Symbol    | Taqman assay ID | Company             |
|--------------------------------------------|-----------|-----------------|---------------------|
| Tumor protein 63                           | TP63      | Hs00978340_1    | Applied Biosystems™ |
| Marker of proliferation Ki-67              | MKI67     | Hs04260396_g1   | Applied Biosystems™ |
| CCAT/enhancer binding protein delta        | CEBPD     | Hs00270931_s1   | Applied Biosystems™ |
| SRY-Box Transcription Factor 9             | SOX9      | Hs00165814_m1   | Applied Biosystems™ |
| Proliferation cell nuclear antigen         | PCNA      | Hs00427214_g1   | Applied Biosystems™ |
| Gap junction protein alpha 1/Connexin-43   | GJA1/CX43 | Hs00748445_s1   | Applied Biosystems™ |
| Keratin, type II cytoskeletal 3            | KRT3      | Hs00365080_m1   | Applied Biosystems™ |
| Keratin, type I cytoskeletal 12            | KRT12     | Hs01057905_g1   | Applied Biosystems™ |
| AXIN2 / Conductin                          | AXIN2     | Hs00610344_m1   | Applied Biosystems™ |
| Wnt Family Member 1                        | WNT1      | Hs00180529_m1   | Applied Biosystems™ |
| Wnt Family Member 2                        | WNT2      | Hs00608224_m1   | Applied Biosystems™ |
| Wnt Family Member 3                        | WNT3      | Hs00902257_m1   | Applied Biosystems™ |
| Wnt Family Member 5A                       | WNT5A     | Hs00998537_m1   | Applied Biosystems™ |
| Wnt Family Member 6                        | WNT6      | Hs00362452_m1   | Applied Biosystems™ |
| Wnt Family Member 7A                       | WNT7A     | Hs01114990_m1   | Applied Biosystems™ |
| Wnt Family Member 11                       | WNT11     | Hs01045906_m1   | Applied Biosystems™ |
| Wnt Family Member 16B                      | WNT16B    | Hs05046520_s1   | Applied Biosystems™ |
| Wnt Inhibitory Factor 1                    | WIF1      | Hs00183662_m1   | Applied Biosystems™ |
| Dickkopf WNT Signaling Pathway Inhibitor 1 | DKK1      | Hs00183740_m1   | Applied Biosystems™ |
| Dickkopf WNT Signaling Pathway Inhibitor 2 | DKK2      | Hs00205294_m1   | Applied Biosystems™ |
